# Supplementary material
Source: PubMed Central journal article supplement (PMC9442005)
Supplement: ajcr0012-4015-f7.pdf [file ajcr0012-4015-f7.pdf]

# sEV-associated miR-6068 promotes PCa aggressiveness

## Supplementary materials

The following supplementary materials are available online at the American Journal of Cancer Research.

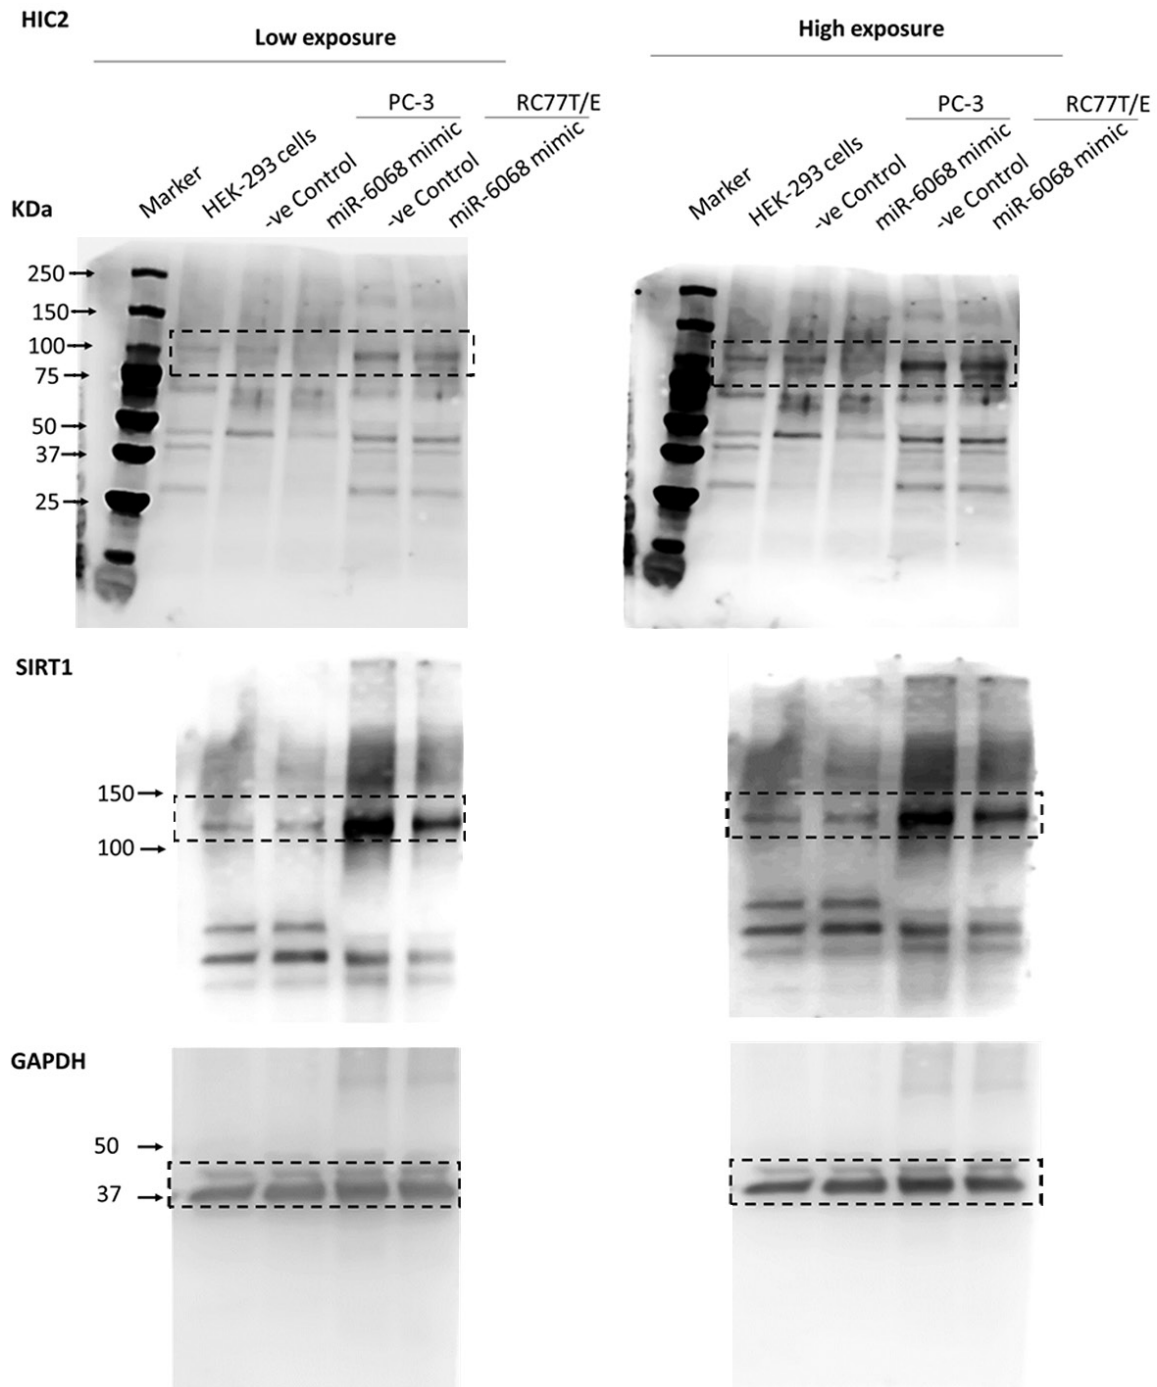

**Supplementary Figure 1.** HIC2 protein expression in miR-6068 mimic-transfected PCa cells. Western blot analysis shows a decrease in HIC2 and SIRT1 after transfection of PCa cells with miR-6068 mimic.

sEV-associated miR-6068 promotes PCa aggressiveness

**Supplementary Table 1.** Clinical information of PCa samples and healthy individuals

| Variable                   | Normal          | PCa            |
|----------------------------|-----------------|----------------|
| Total number               | 30              | 50             |
| Age (Mean $\pm$ SD)        | 67.5 $\pm$ 16.2 | 69.3 $\pm$ 7.2 |
| Gleason score (n)          |                 |                |
| GS<7                       |                 | 13             |
| GS=7                       |                 | 6              |
| GS>7                       |                 | 31             |
| T-stage (n)                |                 |                |
| I                          |                 | 1              |
| II                         |                 | 29             |
| III                        |                 | 13             |
| IV                         |                 | 7              |
| Lymph node involvement (n) |                 |                |
| Yes                        |                 | 6              |
| No                         |                 | 44             |
